# Supplementary material
Source: PubMed Central journal article supplement (PMC4139173)
Supplement: ac501380s_si_002.pdf [file ac501380s_si_002.pdf]

**SI Figure S3. The detailed heatmap for the 323 drug responsive proteins with protein names.**

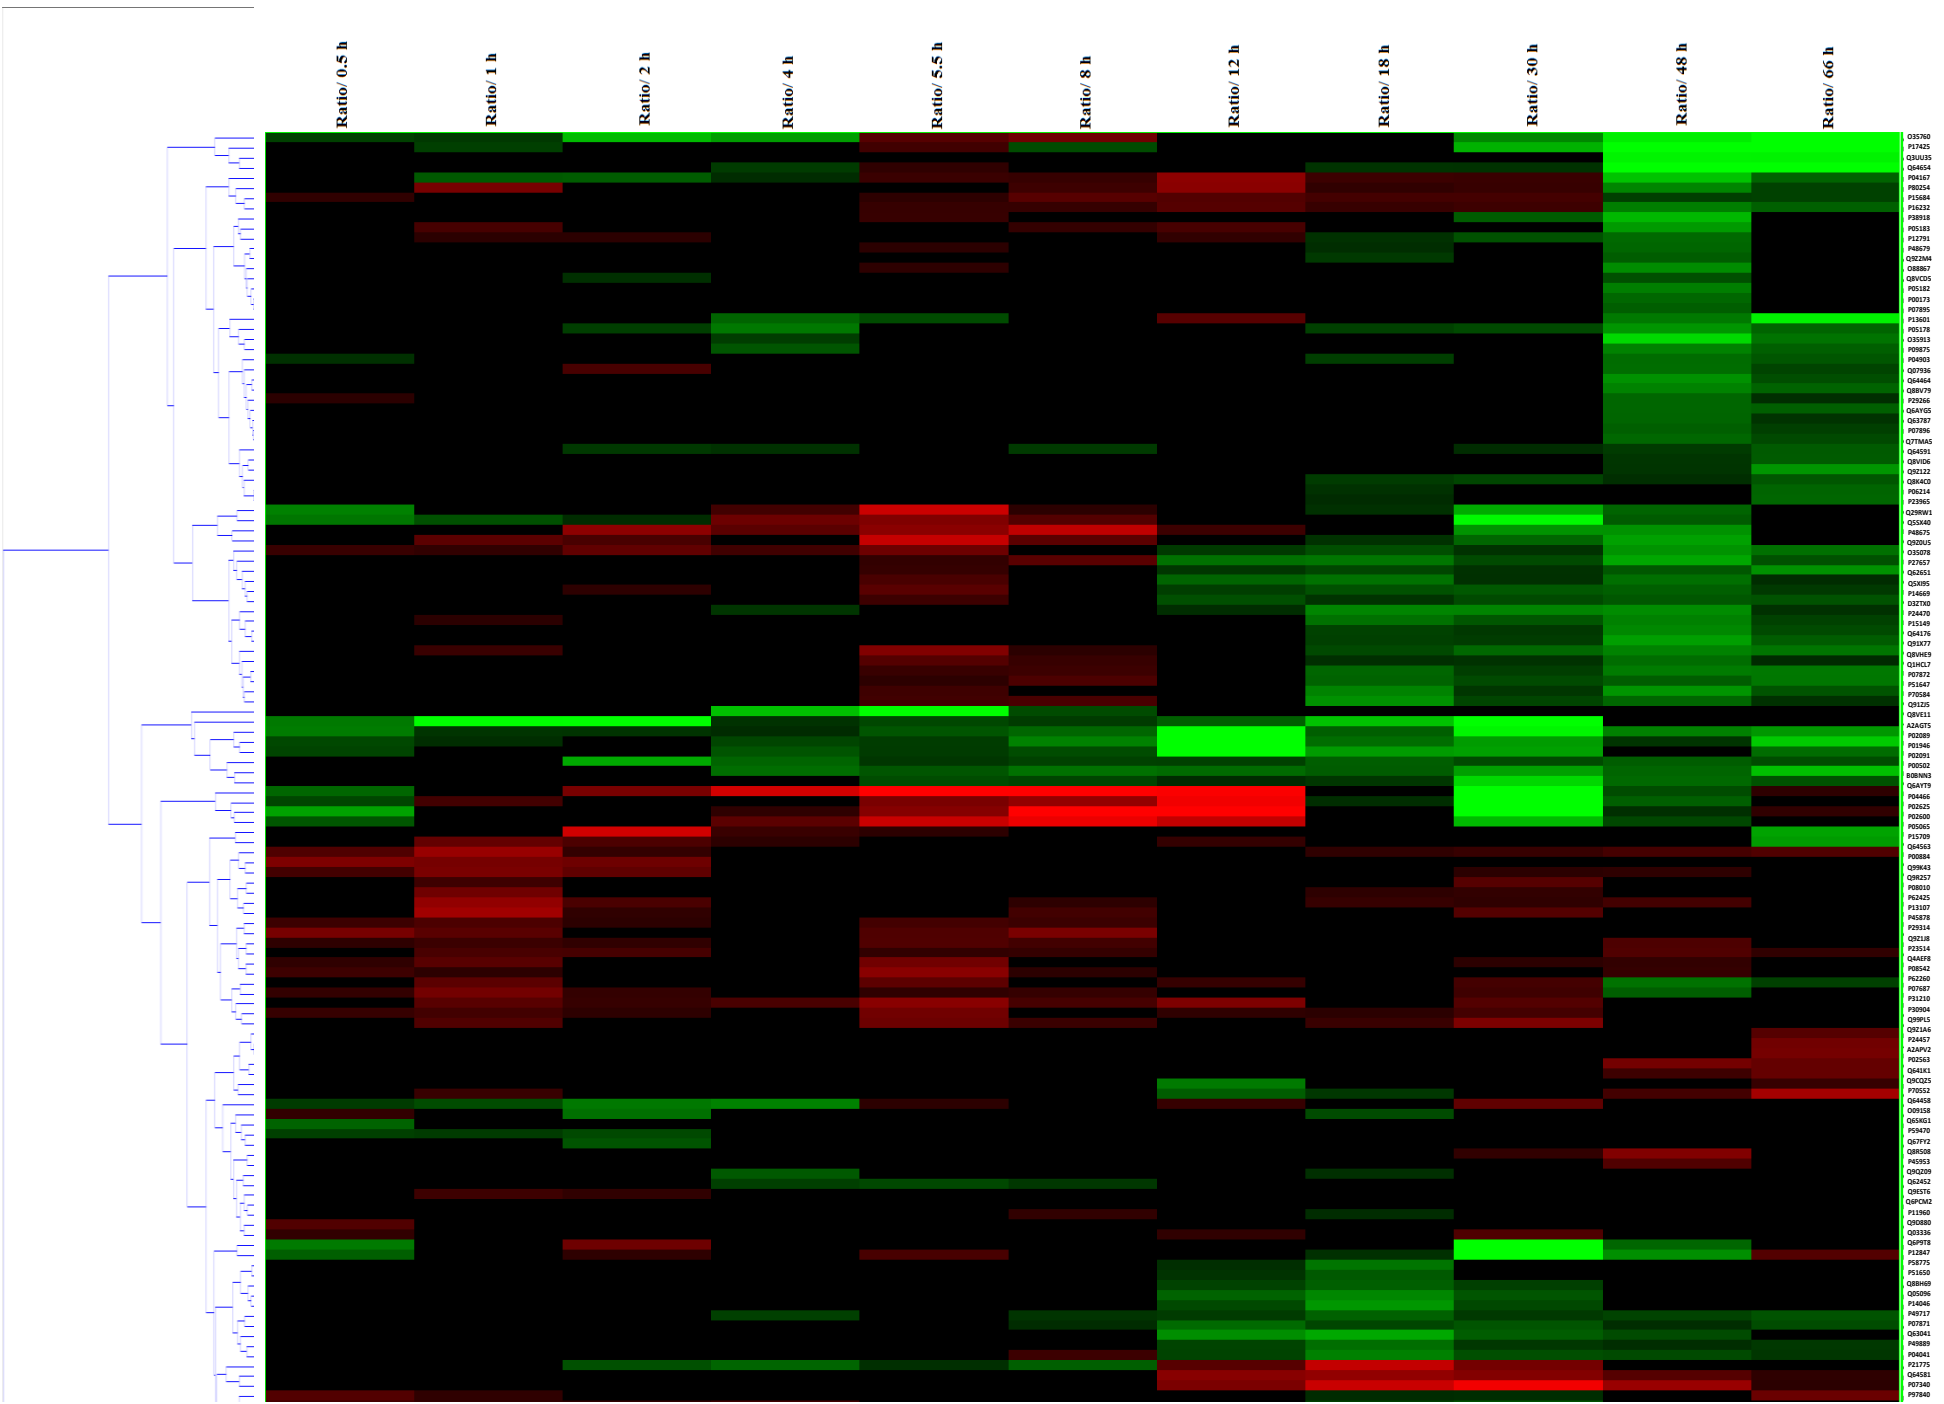

Q03700  
 P17425  
 Q39435  
 Q0454  
 P04187  
 P00254  
 P1484  
 P16232  
 P38918  
 P05183  
 P12791  
 P48079  
 Q02344  
 Q88867  
 Q09025  
 P05182  
 P00273  
 P0296  
 P13601  
 P05278  
 Q39513  
 P09875  
 P00683  
 Q07936  
 Q64464  
 Q89179  
 P3266  
 Q44705  
 Q43187  
 P07896  
 Q270465  
 Q46191  
 Q8706  
 Q0212  
 Q8400  
 P06214  
 P23665  
 Q2389W1  
 Q55940  
 P8635  
 Q09015  
 Q09098  
 P29657  
 Q82651  
 Q23865  
 P14689  
 Q32700  
 P24428  
 P15148  
 Q44376  
 Q81077  
 Q87493  
 Q24617  
 P07872  
 P51647  
 P20284  
 Q91215  
 Q87611  
 Q24375  
 P02089  
 P0296  
 P02091  
 P00502  
 Q80949  
 Q64779  
 P04466  
 P02615  
 P02800  
 P05065  
 P15709  
 Q4543  
 P00684  
 Q0643  
 Q06257  
 P05510  
 P62425  
 P13307  
 P46276  
 P29314  
 Q2618  
 P3514  
 Q44578  
 P08242  
 P6260  
 P07687  
 P12110  
 P30904  
 Q09915  
 Q02146  
 P24457  
 A24972  
 P02613  
 Q45131  
 Q06215  
 P05512  
 Q64458  
 Q09158  
 Q55451  
 P36470  
 Q0792  
 Q85508  
 P46053  
 Q06208  
 Q82452  
 Q05116  
 Q89042  
 P11960  
 Q06040  
 Q09978  
 P12847  
 P58775  
 P34600  
 Q89469  
 Q05096  
 P14846  
 P49717  
 P07871  
 Q53941  
 P46889  
 P06041  
 P12175  
 Q45381  
 P07240  
 P07840

Ratio/ 0,5 h      Ratio/ 1 h      Ratio/ 2 h      Ratio/ 4 h      Ratio/ 5,5 h      Ratio/ 8 h      Ratio/ 12 h      Ratio/ 18 h      Ratio/ 30 h      Ratio/ 48 h      Ratio/ 66 h

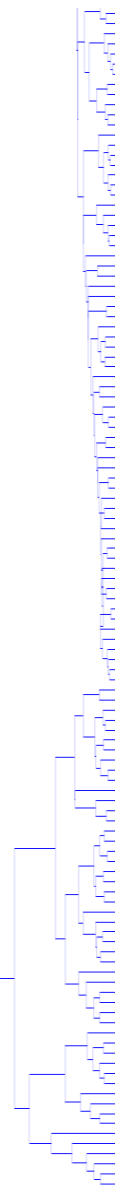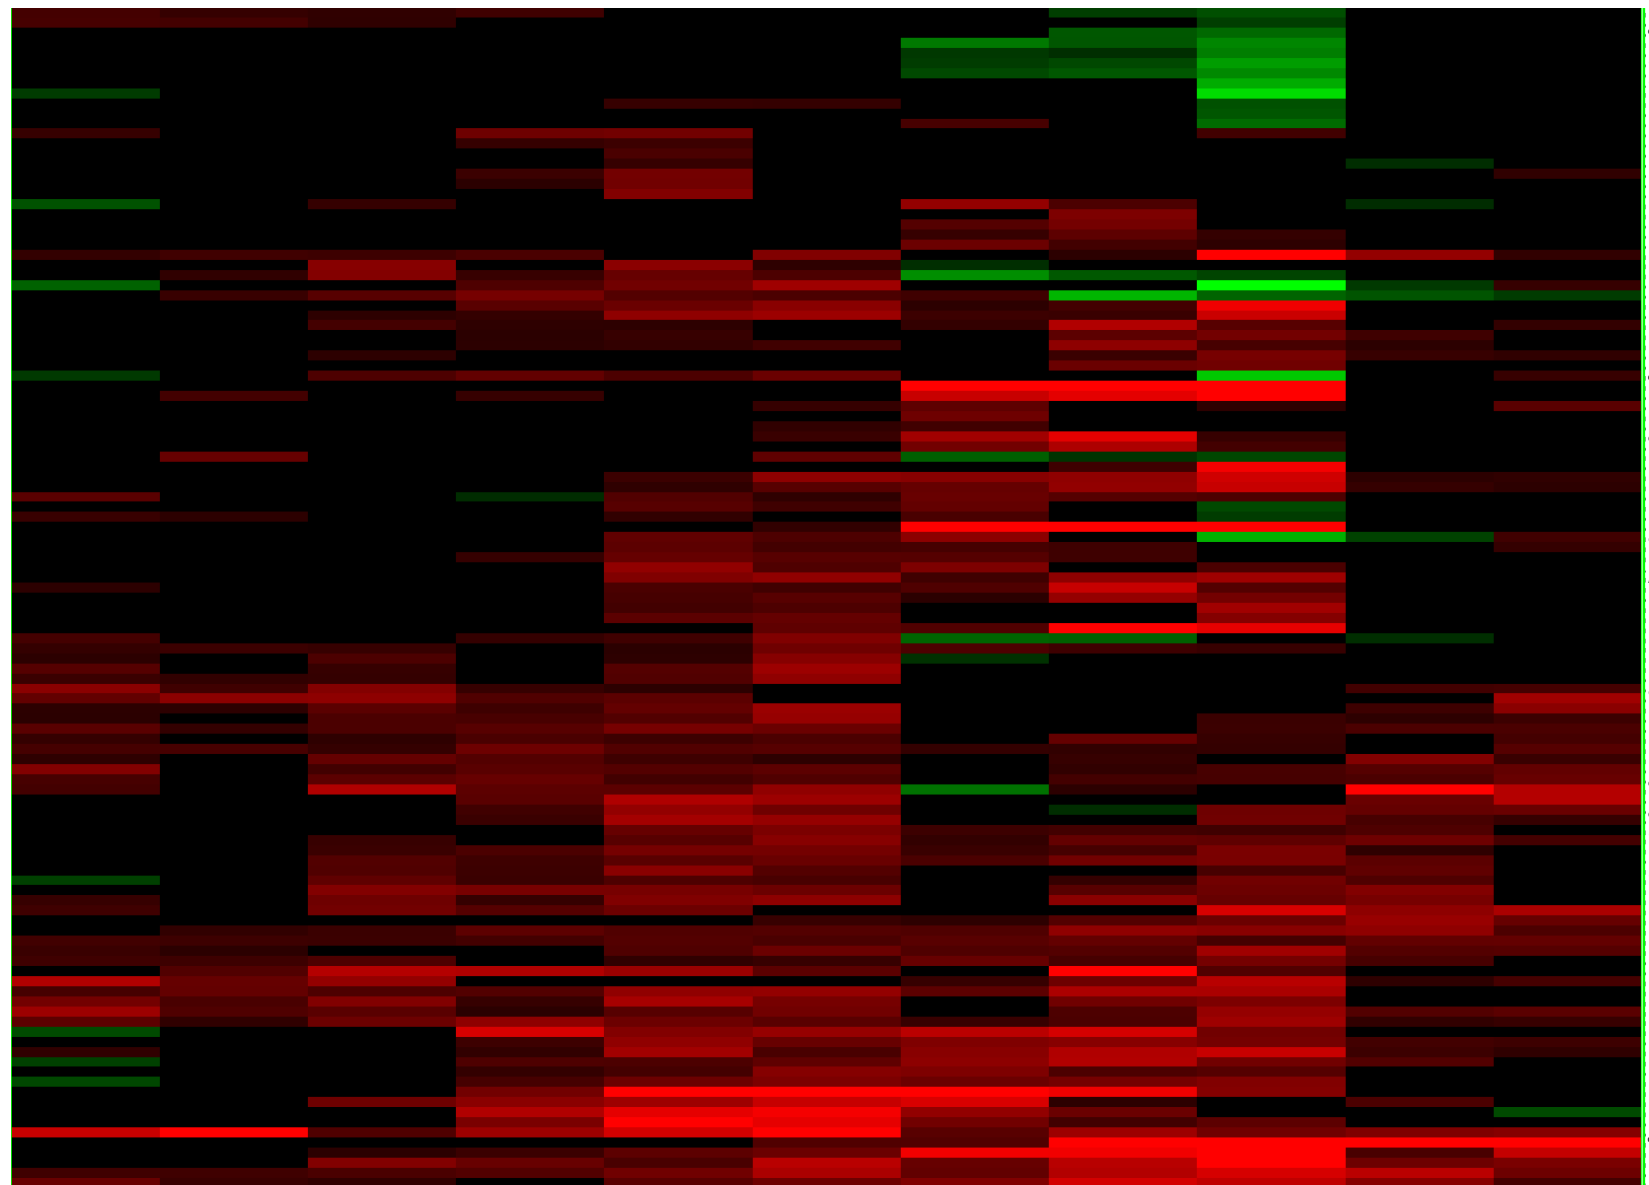

Q2XK88  
P08833  
Q6AXM8  
G5V112  
P03448  
Q8BQY9  
Q84461  
Q3M8B4  
F34566  
P02564  
F28650  
Q62064  
Q80180  
Q81843  
Q81877  
Q82P93  
Q82P95  
Q82P97  
Q83992  
Q71160  
P08136  
F70847  
Q81623  
Q70593  
Q83270  
F34617  
P07150  
F32846  
Q82P76  
Q82P70  
F42062  
Q82P68  
F32322  
F32879  
F35878  
Q82425  
Q82V45  
P08832  
P08830  
Q84481  
Q82P69  
P08238  
Q8WTT6  
F32993  
Q82V27  
F34900  
Q82P71  
P08188  
P04176  
Q84060  
P09455  
Q82C48  
Q82C71  
F34609  
P08527  
Q82C24  
A2VCM9  
F32702  
P82661  
Q84704  
P82721  
P05554  
P81354  
F32123  
P05187  
P82696  
F32348  
Q82C29  
Q35826  
Q82P65  
P04797  
Q88538  
Q82P71  
P07824  
P08026  
F70712  
Q82M75  
Q82S00  
P05179  
Q82M93  
Q82P68  
Q82C28  
F32178  
P82550  
P82083  
Q82V66  
F34638  
P82897  
P05455  
F32785  
P82641  
F31497  
F32788  
F35063  
F82P55  
Q82M95  
Q82V27  
P82853  
F32694  
F32670  
P08139  
P08138  
P08066  
Q82P73  
F33444  
P82029  
Q82C27  
P82619  
F32831  
F32675  
P05155  
Q82V05  
Q82C76  
F34609  
F33221  
P08034

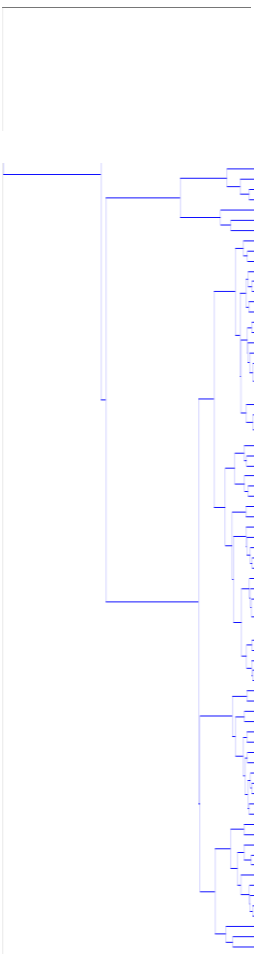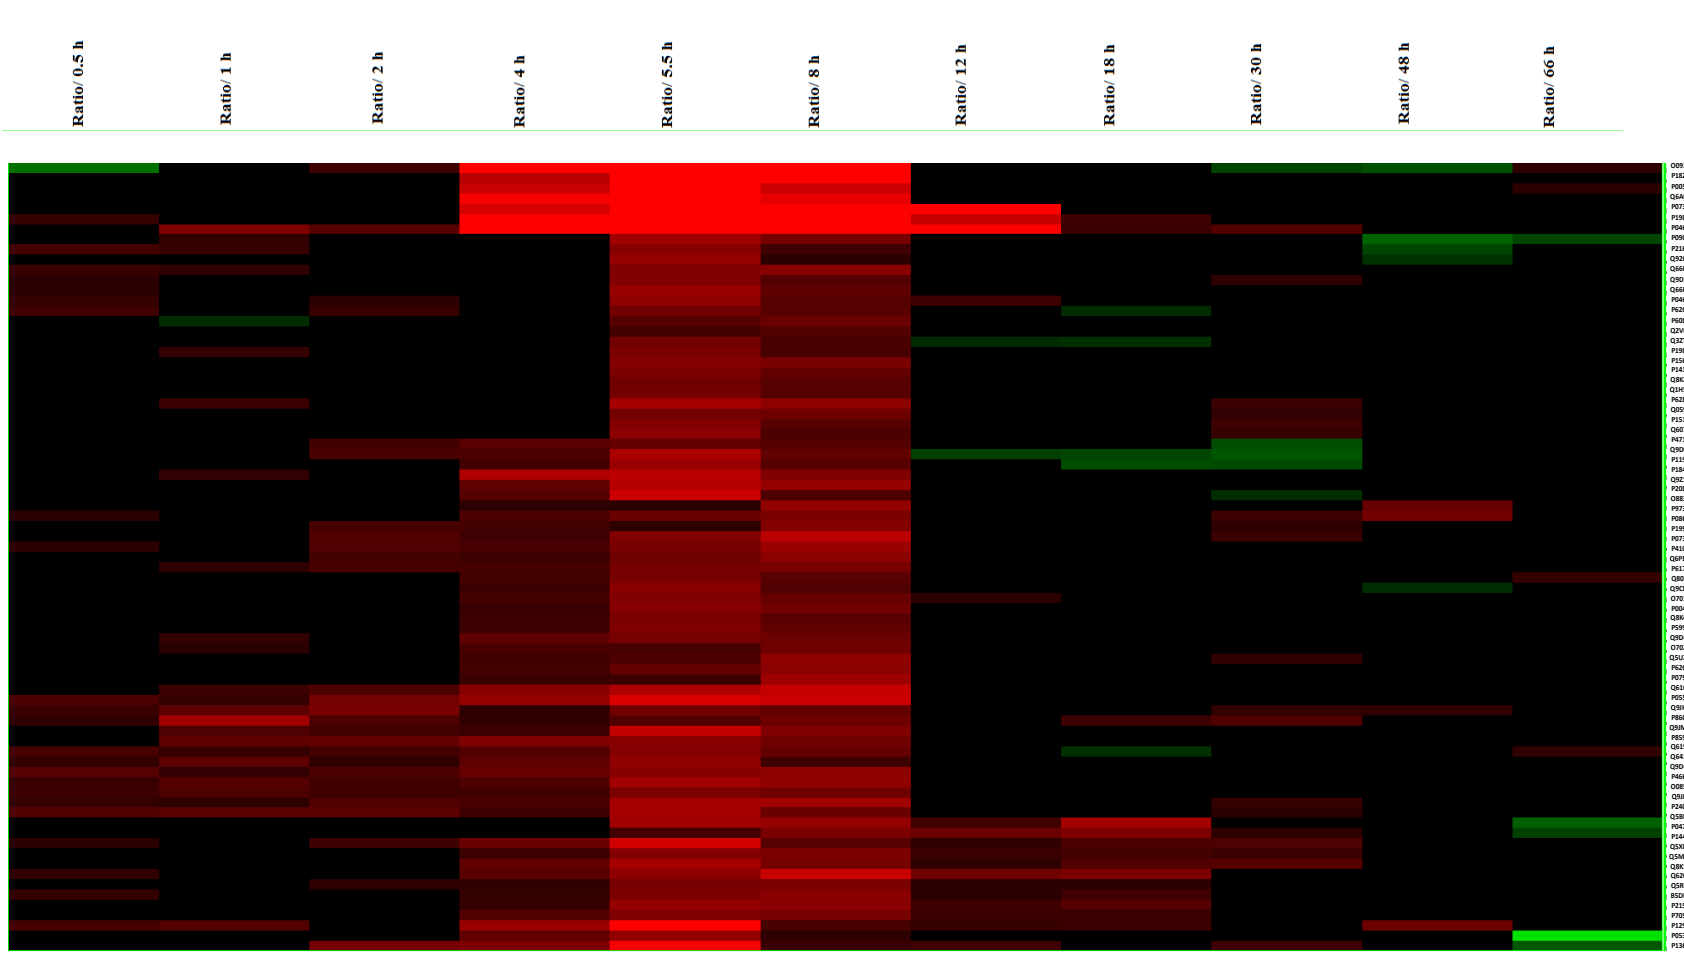

- Q09171
- P18298
- P00564
- Q64232
- P07379
- P13814
- P06564
- P09000
- P10483
- Q52066
- Q66H12
- Q52172
- Q56980
- P06644
- P06222
- P08843
- Q37057
- Q32710
- P13804
- P13050
- P14173
- Q6K224
- Q10415
- P12850
- Q05982
- P11378
- Q60799
- P01786
- Q100059
- P11380
- P14044
- Q52113
- P10214
- Q68879
- P97384
- P06549
- P13945
- P07323
- P01324
- Q6P0V7
- P11751
- Q61963
- Q1K225
- O19209
- P00406
- Q38423
- P09999
- Q10C70
- O19251
- Q5L2L0
- P62830
- P07653
- Q61656
- P55544
- Q52029
- P65048
- Q61803
- P55971
- Q61990
- Q64370
- Q10C72
- P06568
- Q68550
- Q6L170
- P14050
- Q18K63
- P04799
- P14480
- Q630M9
- Q10A779
- Q6K156
- Q62055
- Q61813
- RSDFC8
- P21531
- P70550
- P12939
- P01509
- P13987
